# Supplementary material for: Aortic Fibrosis in Insulin-Sensitive Mice with Endothelial Cell-Specific Deletion of Ceacam1 Gene
Source: MDPI journal article supplement (doi:10.3390/ijms23084335), 2022-04-14
Supplement: s1 [file s1]

## Supplementary Materials

### Materials and Methods

#### Genotyping of mice

C57BL/6J.VECadherinCre+*Cc1*<sup>fl/fl</sup> (VECadCre+*Cc1*<sup>fl/fl</sup>) mice were generated and the specific deletion of both of the short and long isoforms of Ceacam1 was confirmed in isolated endothelial cells as described previously [25]. Mice were backcrossed with C57BL/6J.*Ldlr*<sup>−/−</sup> mice (Jackson Laboratories, Bar Harbor, ME) for ≥6 times. PCR analysis of ear DNA was employed to genotype offsprings using *Ceacam1* (*Cc1*)-specific primers (Fig. S1) and identify *ldlr*<sup>−/−</sup> homozygous mice with wild-type (WT) *Cc1* allele with VECadCre (*ldlr*<sup>−/−</sup> VECadCre+*Cc1*<sup>+/+</sup>) (Cre controls) or without (*ldlr*<sup>−/−</sup> VECadCre−*Cc1*<sup>+/+</sup>) (WT controls), and with *Cc1*-floxed allele with VECadCre (*ldlr*<sup>−/−</sup> VECadCre+*Cc1*<sup>fl/fl</sup>) (null mice) or without (*ldlr*<sup>−/−</sup> VECadCre−*Cc1*<sup>fl/fl</sup>) (Flox controls). All lines were from the same breeding to limit the confounding effects of LoxP and VECadherin.

As previously described [25], the Flox gene was detected by a PCR reaction using FloxA forward primer (FP) with FloxB and FloxC reverse primers (RP) (Fig. S1). The FloxA/FloxB primer set detected the 382bp wild-type allele and the FloxA/FloxC set detected the 488bp Flox allele. As expected, a 488bp sequence from the Flox gene was only amplified in mice positive for *Cc1*<sup>flox/flox</sup>, while a 382bp product was only detected in mice positive for wild-type allele.

Using the Cre primer sets, we detected VECadCre+ allele (300bp VECadherin promoter-Cre) and the VECadherin gene only (550bp for VECadCre− allele).

To identify the *Ldlr*<sup>−/−</sup> mutant band of 350bp, an additional reaction was performed using the OMIR33 49 primer forward and the primer reverse pairs OMIR33 50 and OMIR00 92. As expected, all mice contained this band.

Nucleotide sequences are listed at the bottom of the illustrations.

**Citation:** Abu Helal, R.; Muturi, H.T.; Lee, A.D.; Li, W.; Ghadieh, H.E.; Najjar, S.M. Aortic Fibrosis in Insulin-Sensitive Mice with Endothelial Cell-Specific Deletion of *Ceacam1* Gene. *Int. J. Mol. Sci.* **2022**, *23*, 4335. <https://doi.org/10.3390/ijms23084335>

Academic Editors: Melania Manco and Amalia Gastaldelli

Received: 18 February 2022

Accepted: 10 April 2022

Published: 14 April 2022

**Publisher's Note:** MDPI stays neutral with regard to jurisdictional claims in published maps and institutional affiliations.

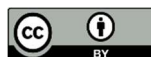

**Copyright:** © 2022 by the author. Licensee MDPI, Basel, Switzerland. This article is an open access article distributed under the terms and conditions of the Creative Commons Attribution (CC BY) license (<https://creativecommons.org/licenses/by/4.0/>).

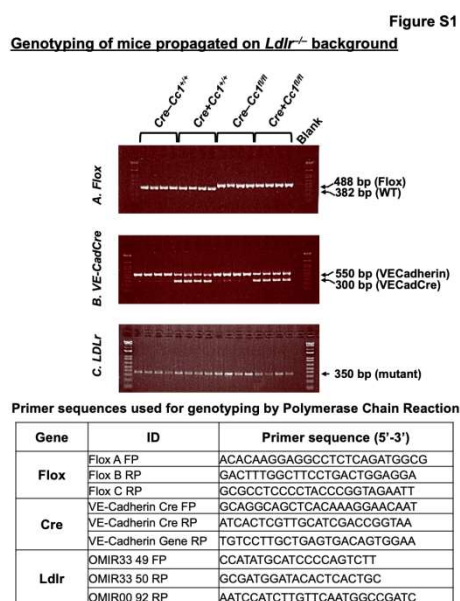

**Figure S1.** Mice Genotyping. PCR amplification was performed on ear DNA using primers to detect genes for (A) Flox; (B) VE-Cadherin-Cre, (C) LDLr deletion. Nucleotide sequences are listed in the table below the agarose gels. FP denotes forward primer and RP denotes reverse primer.

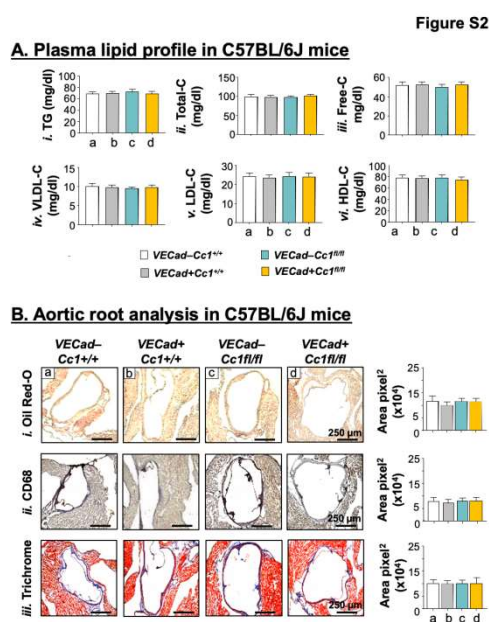

**Figure S2.** Lipid profiling and morphologic analysis of aortic lesions in mice on the C57BL/6J background. Male littermate mice (9 months of age,  $n=4/\text{genotype}$ ) on regular chow diet were fasted overnight and their retro-orbital blood drawn. (A) plasma levels of triacylglycerol (TG) (i), and of cholesterol (C) [total-C, Free-C, VLDL-C, LDL-C, and HDL-C (ii-vi, respectively)] were determined. (B) hearts were embedded in OCT followed by frozen sequential sectioning starting from where the aorta exits the ventricle and moving toward the aortic sinus. Aortic root lesions were analyzed by (i) Oil red-O staining (ORO), (ii) CD68 staining, and (iii) trichrome staining ( $n=4\text{mice/genotype}$  and representatives of each was included). Stained aortic areas were measured in  $\text{pixel}^2$  using Image J, and values were expressed as mean  $\pm$  SEM. Abbreviations: -C, cholesterol; -TG, triacylglycerol; OCT, optimal cutting temperature; ORO, Oil-Red O staining.

**Table S1.** Real-time PCR primer sequences from mouse genes

| Primer             | Forward Sequence (5'-3') | Reverse Sequence (5'-3') |
|--------------------|--------------------------|--------------------------|
| <i>Ang-1</i>       | CTCGTCAGACATTCATCATCCA   | CACCTTCTTTAGTGCAAAGGCT   |
| <i>Ang-2</i>       | CAGCCACGGTCAACAACCTC     | CTTCTTTACGGATAGCAACCGAG  |
| <i>β-Catenin</i>   | TCCCTGAGACGCTAGATGAGG    | CGTTTAGCAGTTTTGTCAGCTC   |
| <i>Cd4</i>         | TCACCTGGAAGTTCTCTGACC    | GGAATCAAAACGATCAAACCTGCG |
| <i>Cd8</i>         | CTCTGGCTGGTCTTCAGTATGA   | TCTTTGCCGTATGGTTGGTTT    |
| <i>Cd11b</i>       | TACGTAATTGGGGTGGGAA      | GTGCCCTCAATTGCAAAGAT     |
| <i>Claudin-1</i>   | TGAGCCTCAGAAAAGAGCC      | GCCACTAATATCGCCAGACC     |
| <i>Claudin-5</i>   | ATGGCGATTACGACAAGAAG     | ACTGAGCAAATTCCTTGCCC     |
| <i>Col6α3</i>      | GTCAGCTGAGTCTTGCTGT      | ACCTAGAGAACGTTACCTCACT   |
| <i>Ctgf</i>        | AATGTCAGTGCGCAGCCGAAGCA  | AGGGGTCACGCTCCGTACACAG   |
| <i>Et-1</i>        | GGTGGAAGGAAGGAACTAC      | CAAGAAGAGGCAGAAAGGCA     |
| <i>Etar</i>        | AACAAGTGTATGAGGACGGC     | GGCCAAGATGAAGGAAAGAA     |
| <i>Etbr</i>        | CAGTCTTCTGCCTGGTCCTC     | GGAAGTCTTTTCCTCAAACG     |
| <i>F4/80</i>       | CAAGGAGGACAGAGTTTATCGTG  | CTTTGGCTATGGGCTTCCAGTC   |
| <i>Fibronectin</i> | ACGGTGTCAACTACAAGATCG    | GTCTTCCCATCGTCATAGCAC    |
| <i>Foxp3</i>       | CCCAGGAAAGACAGCAACCTT    | TTTCAACAACAGGCCACTTG     |
| <i>Gp91</i>        | TATGCTGATCCTGCTGCCAGT    | TGTCTTCGAATCCTTGTCGAGC   |
| <i>Il-1β</i>       | CCCTGCAGCTGGAGAGTGTGG    | TATTCTGTCCATTGAGGTGGAG   |
| <i>Il-6</i>        | CTTGGGACTGCCGCTGGTGA     | TGCAAGTGCATCATCGTTGT     |
| <i>Mcp-1/Ccl2</i>  | CTTCTGGGCCTGCTGTTCA      | CCAGCCTACTCATTGGGATCA    |
| <i>Nox4</i>        | TCCAAGCTCATTTCCACAG      | CGGAGTTCATTACATCAGAGG    |
| <i>Npc-1</i>       | GGGGCATCAGTTACAATGCT     | AAACACCGCACTTCCCATAG     |
| <i>Occludin</i>    | CTTCTGCTTCATCGCTTCC      | CTTGCCCTTTCCTGCTTTC      |
| <i>α-Sma</i>       | CGTGGCTATTCCTTCGTTAC     | TGCCAGGAGACTCCATCC       |
| <i>Smad7</i>       | GTTGCTGTGAATCTTACGGG     | ATCTGGACAGCCTGCA         |
| <i>Tgfb</i>        | GTGGAAATCAACGGGATCAG     | ACTTCCAACCCAGGTCCTTC     |
| <i>Tlr-2</i>       | TTGCTGGGCTGACTTCTCTCA    | GAAGAGTCAGGTGATGGATGTCG  |
| <i>Tlr-4</i>       | TCAGAACTTCAGTGGCTGGATT   | AACTCTGGATAGGGTTTCTGTCA  |
| <i>Tnfα</i>        | CCACCACGCTCTTCTGTCTAC    | AGGGTCTGGGCCATAGAACT     |
| <i>Vcam-1</i>      | ATTTTCTGGGGCAGGAAGTT     | ACGTGAGAACAACCGAATCC     |
| <i>Vegf-A</i>      | GCACATAGAGAGAATGAGCTTC   | CTCCGCTCTGAACAAGGCT      |
| <i>Vegfr-1</i>     | TGGCTCTACGACCTTAGACTG    | CAGGTTTGACTTGTCTGAGGT    |
| <i>Vegfr-2</i>     | TTTGGAATAACAACCCCTTCAG   | GCAGAAGATACTGTCACCACC    |
| <i>VE-Cadherin</i> | CACTGCTTTGGGAGCCTTC      | GGGGCAGCGATTCAATTTTCT    |
| <i>Zo-1</i>        | ACAAACAGCCCTACCAACC      | CCATCCTCATCTTCATCTTCTC   |
| <i>18S</i>         | TTCGAACGTCTGCCCTATCAA    | ATGGTAGGCACGGCGACTA      |

**Table S2.** mRNA levels of inflammatory genes in the aortae of 9-month-old mice propagated on the *Ldlr*<sup>−/−</sup> background and fed an atherogenic high cholesterol diet in the last 3 months.

|                     | <i>Ldlr</i> <sup>−/−</sup><br><i>VECad</i> − <i>Cc1</i> <sup>+/+</sup> | <i>Ldlr</i> <sup>−/−</sup><br><i>VECad</i> + <i>Cc1</i> <sup>+/+</sup> | <i>Ldlr</i> <sup>−/−</sup><br><i>VECad</i> − <i>Cc1</i> <sup>+/+</sup> | <i>Ldlr</i> <sup>−/−</sup><br><i>VECad</i> + <i>Cc1</i> <sup>fl/fl</sup> |
|---------------------|------------------------------------------------------------------------|------------------------------------------------------------------------|------------------------------------------------------------------------|--------------------------------------------------------------------------|
| <b>Inflammation</b> |                                                                        |                                                                        |                                                                        |                                                                          |
| F4/80               | 0.74 ± 0.19                                                            | 0.28 ± 0.07                                                            | 1.20 ± 0.30                                                            | 4.65 ± 1.07*†§                                                           |
| Cd4                 | 0.58 ± 0.12                                                            | 0.65 ± 0.11                                                            | 0.64 ± 0.11                                                            | 1.58 ± 0.17*†§                                                           |
| Cd8                 | 1.16 ± 0.10                                                            | 1.23 ± 0.13                                                            | 1.07 ± 0.04                                                            | 2.54 ± 0.15*†§                                                           |
| FoxP3               | 0.89 ± 0.05                                                            | 0.82 ± 0.09                                                            | 0.87 ± 0.04                                                            | 0.89 ± 0.06                                                              |
| Il-1β               | 0.75 ± 0.06                                                            | 0.72 ± 0.08                                                            | 0.75 ± 0.07                                                            | 1.87 ± 0.23*†§                                                           |
| Il-6                | 0.33 ± 0.09                                                            | 0.53 ± 0.09                                                            | 0.54 ± 0.28                                                            | 1.35 ± 0.25*†§                                                           |
| Tnfα                | 0.35 ± 0.22                                                            | 1.37 ± 0.18                                                            | 1.32 ± 0.90                                                            | 5.50 ± 0.87*†§                                                           |
| Mcp-1/Ccl2          | 1.19 ± 0.04                                                            | 1.18 ± 0.13                                                            | 1.58 ± 0.16                                                            | 2.59 ± 0.19*†§                                                           |
| Tlr-2               | 0.29 ± 0.18                                                            | 0.39 ± 0.08                                                            | 0.21 ± 0.07                                                            | 2.19 ± 0.69*†§                                                           |
| Tlr-4               | 0.47 ± 0.01                                                            | 0.69 ± 0.12                                                            | 0.52 ± 0.08                                                            | 1.71 ± 0.18*†§                                                           |
| Cd11b               | 0.93 ± 0.05                                                            | 1.03 ± 0.24                                                            | 1.04 ± 0.07                                                            | 2.31 ± 0.14*†§                                                           |
| Vcam-1              | 0.72 ± 0.27                                                            | 0.75 ± 0.08                                                            | 0.38 ± 0.08                                                            | 2.94 ± 0.65*†§                                                           |

6-month-old mice (n≥5 per group) were fed an atherogenic HC diet for 3 months before being fasted overnight. Aortae were collected to measure mRNA content by qRT-PCR (normalized to 18S). Values were expressed as mean ± SEM. \*P<0.05 vs *Ldlr*<sup>−/−</sup>*VECad*−*Cc1*<sup>+/+</sup>, †P<0.05 vs *Ldlr*<sup>−/−</sup>*VECad*+*Cc1*<sup>+/+</sup>, §P<0.05 vs *Ldlr*<sup>−/−</sup>*VECad*−*Cc1*<sup>fl/fl</sup>.

**Table S3.** mRNA levels of genes in the aortae of 9-month-old mice propagated on the *Ldlr*<sup>−/−</sup> background and fed an atherogenic diet in the last 3 months.

|                           | <i>VECad</i> − <i>Cc1</i> <sup>+/+</sup><br><i>Ldlr</i> <sup>−/−</sup> | <i>VECad</i> + <i>Cc1</i> <sup>+/+</sup><br><i>Ldlr</i> <sup>−/−</sup> | <i>VECad</i> − <i>Cc1</i> <sup>R/R</sup><br><i>Ldlr</i> <sup>−/−</sup> | <i>VECad</i> + <i>Cc1</i> <sup>R/R</sup><br><i>Ldlr</i> <sup>−/−</sup> |
|---------------------------|------------------------------------------------------------------------|------------------------------------------------------------------------|------------------------------------------------------------------------|------------------------------------------------------------------------|
| <b>Tight junctions</b>    |                                                                        |                                                                        |                                                                        |                                                                        |
| Zo-1                      | 2.18 ± 0.40                                                            | 2.37 ± 0.18                                                            | 2.11 ± 0.33                                                            | 0.84 ± 0.14*†§                                                         |
| Claudin1                  | 2.32 ± 0.11                                                            | 2.07 ± 0.15                                                            | 2.01 ± 0.38                                                            | 0.78 ± 0.04*†§                                                         |
| Claudin5                  | 2.06 ± 0.25                                                            | 2.08 ± 0.16                                                            | 2.03 ± 0.37                                                            | 0.69 ± 0.26*†§                                                         |
| Occludin                  | 2.28 ± 0.05                                                            | 2.89 ± 0.32                                                            | 2.45 ± 0.08                                                            | 0.61 ± 0.06*†§                                                         |
| <b>Vascular integrity</b> |                                                                        |                                                                        |                                                                        |                                                                        |
| VE-Cadherin               | 1.31 ± 0.12                                                            | 1.23 ± 0.18                                                            | 1.59 ± 0.39                                                            | 0.50 ± 0.05*†§                                                         |
| β-Catenin                 | 1.05 ± 0.04                                                            | 1.29 ± 0.26                                                            | 1.09 ± 0.12                                                            | 0.48 ± 0.07*†§                                                         |
| Vegfr-1                   | 2.70 ± 0.57                                                            | 2.54 ± 0.42                                                            | 2.31 ± 0.09                                                            | 0.84 ± 0.23*†§                                                         |
| Vegfr-2                   | 1.60 ± 0.29                                                            | 1.84 ± 0.14                                                            | 1.29 ± 0.067                                                           | 0.30 ± 0.14*†§                                                         |
| Vegf-A                    | 3.26 ± 0.43                                                            | 3.65 ± 0.41                                                            | 3.29 ± 0.28                                                            | 1.57 ± 0.28*†§                                                         |
| Ang-1                     | 2.33 ± 0.49                                                            | 2.11 ± 0.11                                                            | 2.67 ± 0.41                                                            | 0.86 ± 0.04*†§                                                         |
| Ang-2                     | 1.36 ± 0.17                                                            | 1.49 ± 0.19                                                            | 1.55 ± 0.31                                                            | 0.27 ± 0.16*†§                                                         |
| <b>Oxidative stress</b>   |                                                                        |                                                                        |                                                                        |                                                                        |
| Nox4                      | 2.40 ± 0.05                                                            | 2.98 ± 0.27                                                            | 2.34 ± 0.42                                                            | 4.52 ± 0.07*†§                                                         |
| Gp91                      | 1.32 ± 0.12                                                            | 1.467 ± 0.38                                                           | 2.37 ± 0.51                                                            | 4.16 ± 0.49*†§                                                         |
| Npc-1                     | 1.08 ± 0.09                                                            | 1.09 ± 0.11                                                            | 1.05 ± 0.12                                                            | 0.62 ± 0.07*†§                                                         |
| <b>Fibrosis</b>           |                                                                        |                                                                        |                                                                        |                                                                        |
| Fibronectin               | 1.44 ± 0.24                                                            | 1.55 ± 0.29                                                            | 0.98 ± 0.16                                                            | 5.14 ± 0.29*†§                                                         |
| Ctgf                      | 1.41 ± 0.15                                                            | 1.41 ± 0.08                                                            | 1.14 ± 0.26                                                            | 5.53 ± 1.20*†§                                                         |
| α-Sma                     | 1.94 ± 0.32                                                            | 2.13 ± 0.30                                                            | 1.34 ± 0.33                                                            | 7.25 ± 1.21*†§                                                         |
| Col6-α3                   | 1.29 ± 0.11                                                            | 1.29 ± 0.13                                                            | 1.53 ± 0.27                                                            | 3.14 ± 0.06*†§                                                         |
| Tgf-β                     | 0.80 ± 0.08                                                            | 0.48 ± 0.41                                                            | 0.94 ± 0.10                                                            | 5.04 ± 0.29*†§                                                         |
| Smad7                     | 1.49 ± 0.14                                                            | 1.58 ± 0.23                                                            | 1.82 ± 0.39                                                            | 0.54 ± 0.01*†§                                                         |
| Et-1                      | 1.75 ± 0.65                                                            | 1.04 ± 0.20                                                            | 1.30 ± 0.13                                                            | 3.30 ± 0.29*†§                                                         |
| Etar                      | 1.05 ± 0.20                                                            | 0.89 ± 0.40                                                            | 1.04 ± 0.49                                                            | 3.44 ± 0.41*†§                                                         |
| Etbr                      | 2.36 ± 0.51                                                            | 2.19 ± 0.17                                                            | 2.14 ± 0.23                                                            | 0.76 ± 0.10*†§                                                         |
| Etar/Etbr                 | 0.64 ± 0.20                                                            | 0.22 ± 0.07                                                            | 0.60 ± 0.27                                                            | 3.10 ± 0.85*†§                                                         |

6-month-old male mice (n≥5 per group) were fed an atherogenic diet for 3 months before being fasted overnight. Aortae were collected to measure mRNA content by qRT-PCR (normalized to 18S). Values were expressed as mean ± SEM.

\*P<0.05 vs *Ldlr*<sup>−/−</sup>*VECad*−*Cc1*<sup>+/+</sup>; †P<0.05 vs *Ldlr*<sup>−/−</sup>*VECad*+*Cc1*<sup>+/+</sup>; §P<0.05 vs *Ldlr*<sup>−/−</sup>*VECad*−*Cc1*<sup>R/R</sup>.
